# Supplementary material for: Induced CD8α identifies human NK cells with enhanced proliferative fitness and modulates NK cell activation
Source: PubMed Central journal article supplement (PMC11291271; doi:10.1172/jci173602), 2024-05-28

ERK

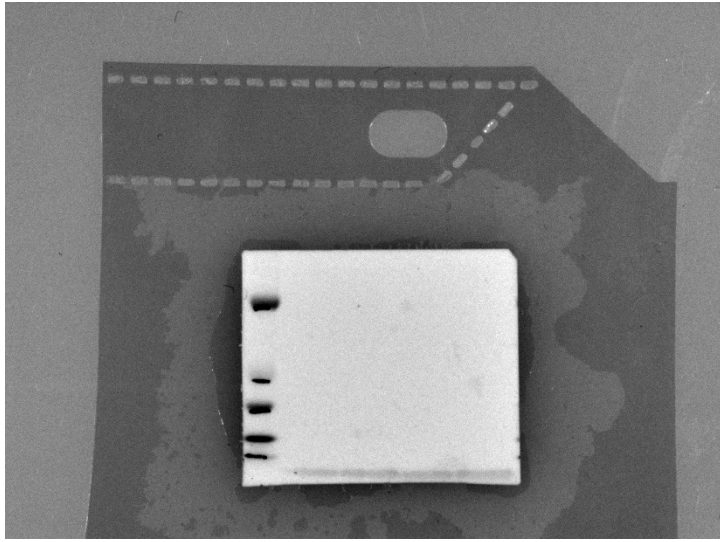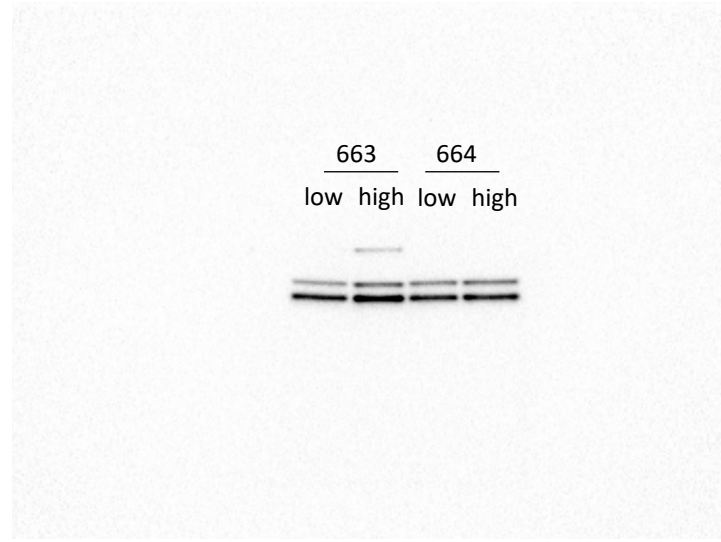

Full unedited gels for Supplemental Figure 6C

STAT5

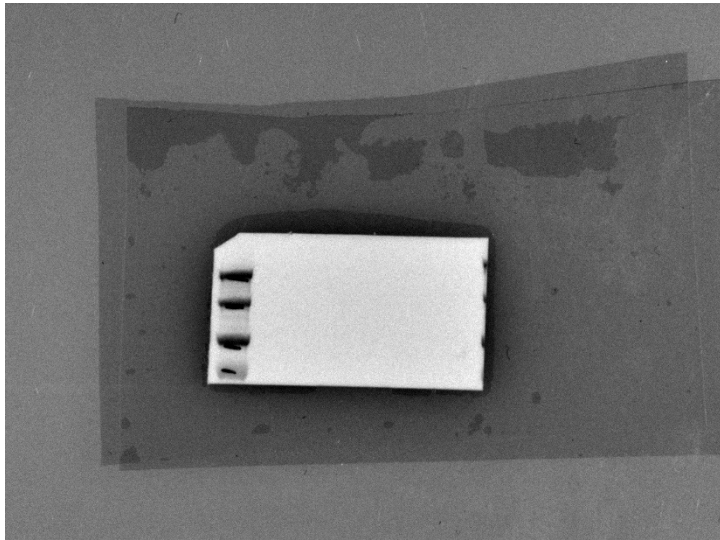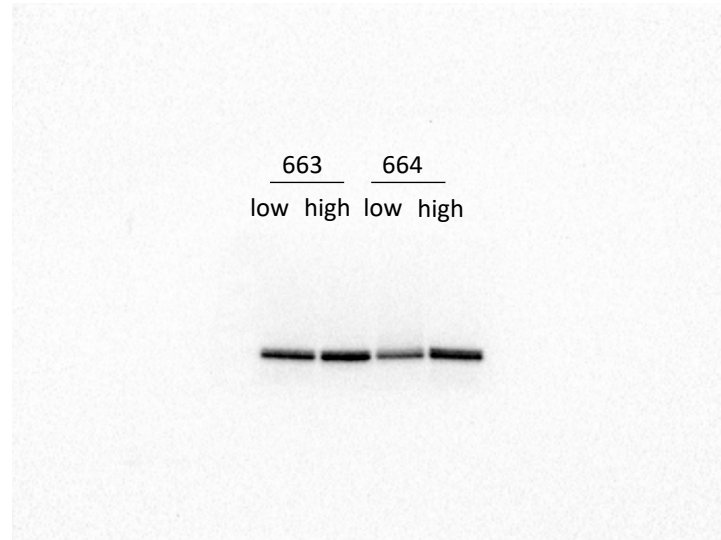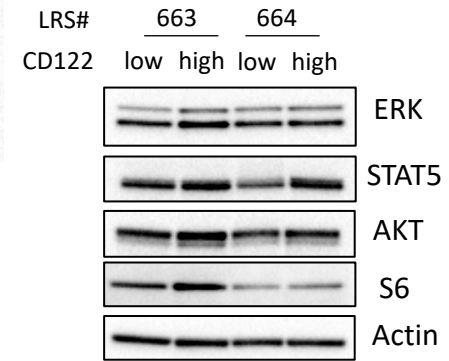

AKT

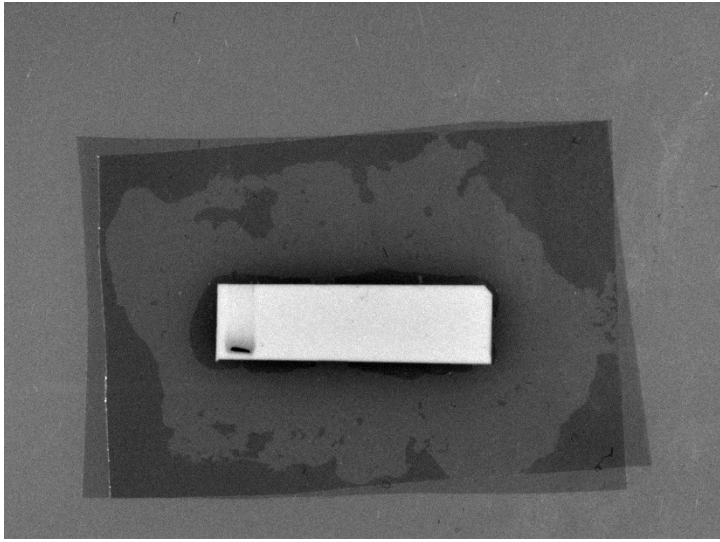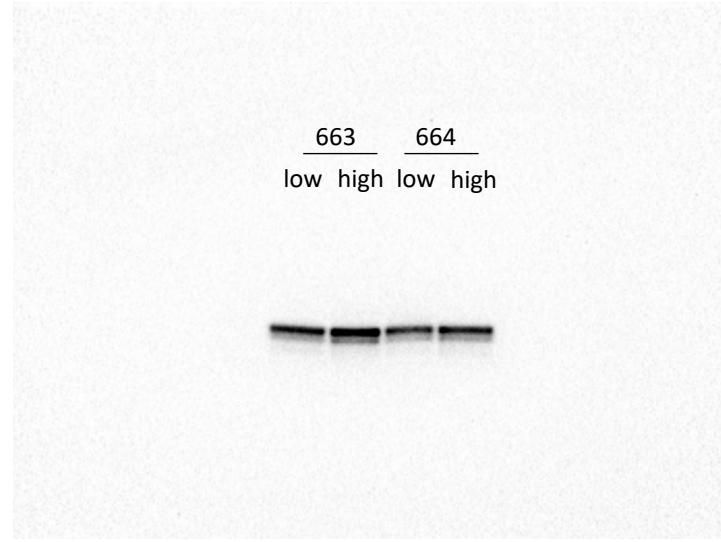

Full unedited gels for Supplemental Figure 6C

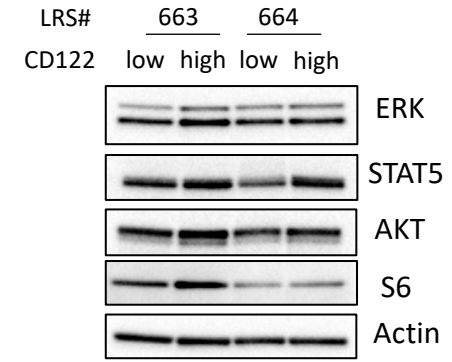

S6

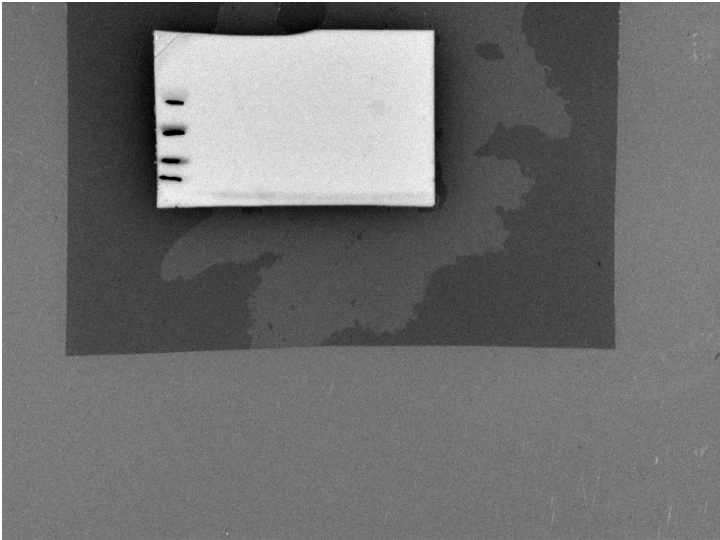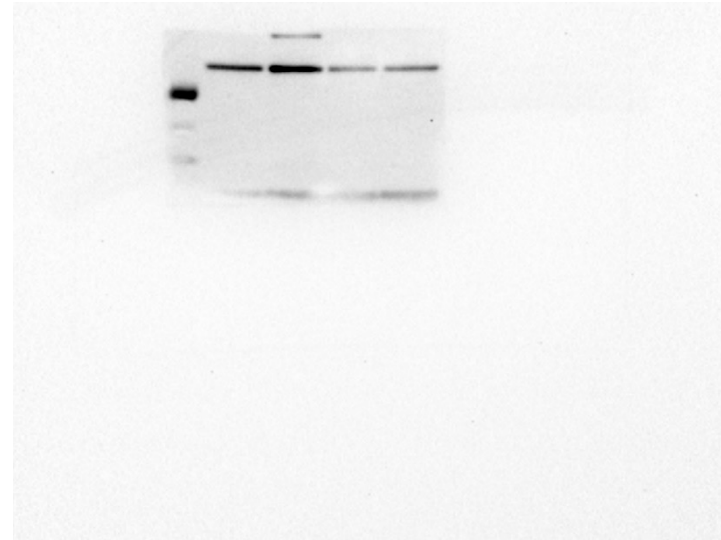

Actin

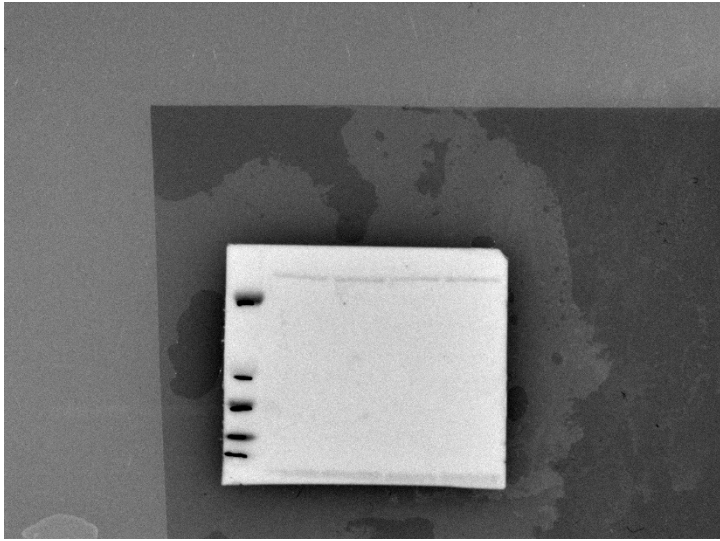

Full unedited gels for Supplemental Figure 6C

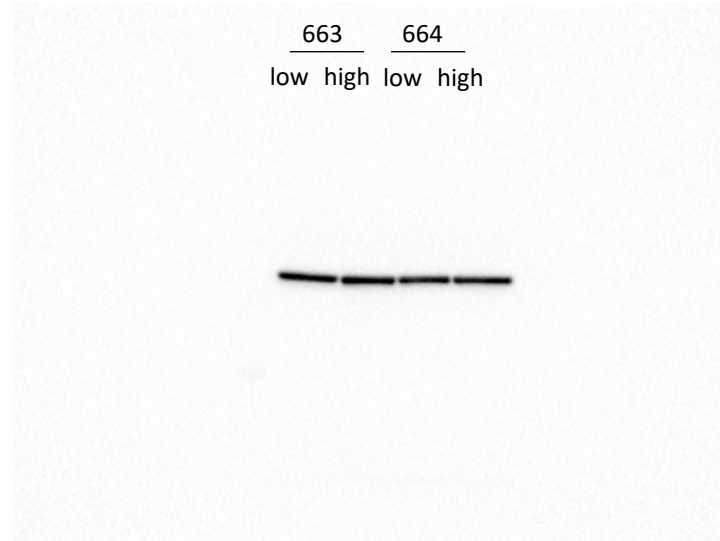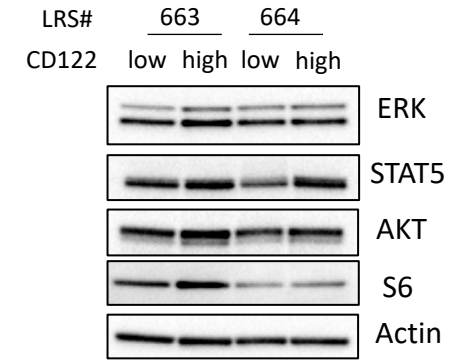

Supplement: jci-134-173602-s161.pdf [file jci-134-173602-s161.pdf]
